# Supplementary material
Source: PubMed Central journal article supplement (PMC10859910)
Supplement: NIHMS1884893-supplement-SDC_1__Definitions_of_step-based_metrics.pdf [file NIHMS1884893-supplement-SDC_1__Definitions_of_step-based_metrics.pdf]

## SDC 1. Definitions of step-based metrics

| Metric                             | Definition                                                                                       |
|------------------------------------|--------------------------------------------------------------------------------------------------|
| <b>Step-based metrics</b>          |                                                                                                  |
| Volume indicators (steps/day)      |                                                                                                  |
| Step volume                        | Sum of steps/min accumulated in a day                                                            |
| Peak effort indicators (steps/min) |                                                                                                  |
| Peak 30-min cadence                | Average steps/min recorded for the 30 highest, but not necessarily consecutive, minutes in a day |
| Time spent stepping (min/day)      |                                                                                                  |
| Sporadic movement                  | Daily time at 1–39 steps/min                                                                     |
| Non-walking movement               | Daily time at 1–69 steps/min                                                                     |
| Minimally purposeful stepping      | Daily time at $\geq 40$ steps/min                                                                |
| Minimally slow walking             | Daily time at $\geq 70$ steps/minute                                                             |
| Brisk ambulation                   | Daily time at $\geq 100$ steps/minute                                                            |
| Time in non-movement (hours/day)   |                                                                                                  |
| Time at zero cadence*              | Daily time at 0 steps/min during wear time                                                       |
| <b>Count-based metrics</b>         |                                                                                                  |
| Volume indicators (counts/day)     |                                                                                                  |
| Count volume                       | Sum of counts/min accumulated in a day                                                           |
| Time in PA (min/day)               |                                                                                                  |
| Light intensity PA                 | Daily time at 100-1,534 counts/min                                                               |
| Moderate-to-vigorous PA            | Daily time at $\geq 1,535$ counts/min                                                            |
| Time in non-movement (hours/day)   |                                                                                                  |
| Sedentary time*                    | Daily time at $\leq 99$ counts/min during wear time                                              |
| <b>Self-reported metrics</b>       |                                                                                                  |
| Volume indicators                  |                                                                                                  |
| MET-min/day                        | Weighted sum of min/day in moderate PA (4 METs) and vigorous PA (8 METs)                         |
| Time in PA (min/day)               |                                                                                                  |
| Moderate-to-vigorous PA            | Sum of min/day in moderate and vigorous PA                                                       |
| Time in non-movement (hours/day)   |                                                                                                  |
| Sedentary time                     | Usual daily time spent sitting or reclining                                                      |

\*Standardized to 16 hours/day of accelerometer wear  
PA, physical activity; MET, metabolic equivalents
